# Supplementary material for: Simulated swelling during low-temperature N2adsorption in polymers of intrinsic microporosity
Source: Royal Society of Chemistry journal article supplement (doi:10.1039/c3cp53402b), 2013-01-01
Supplement: c3cp53402b.pdf [file c3cp53402b.pdf]

## Supplemental Information

# Simulated swelling during low temperature N<sub>2</sub> adsorption in polymers of intrinsic microporosity

Kyle E. Hart,<sup>†</sup> Jeffrey M. Springmeier,<sup>†</sup> Neil B. McKeown,<sup>‡</sup> and Coray M. Colina<sup>\*,†</sup>

*Department of Materials Science and Engineering, The Pennsylvania State University, University  
Park, PA 16802, and School of Chemistry, Cardiff University, Cardiff, CF10 3AT, U.K.*

E-mail: colina@matse.psu.edu

## Contents

|          |                                              |           |
|----------|----------------------------------------------|-----------|
| <b>1</b> | <b>Overview</b>                              | <b>2</b>  |
| <b>2</b> | <b>Molecular Models</b>                      | <b>2</b>  |
| 2.1      | PIM-1 . . . . .                              | 4         |
| 2.2      | PIM-1c . . . . .                             | 5         |
| 2.3      | sPIM-1 . . . . .                             | 6         |
| 2.4      | PIM-SBF . . . . .                            | 7         |
| 2.5      | PIM-SBF-Me . . . . .                         | 8         |
| <b>3</b> | <b>Effective Swelling</b>                    | <b>9</b>  |
| <b>4</b> | <b>Characterization</b>                      | <b>10</b> |
| 4.1      | Radial distribution functions . . . . .      | 10        |
| 4.2      | Structure factors . . . . .                  | 11        |
| 4.3      | Pore Size Distributions . . . . .            | 12        |
| 4.4      | Curling Angle Distributions . . . . .        | 13        |
| 4.5      | Spiro-Angle Distributions . . . . .          | 14        |
| 4.6      | N <sub>2</sub> adsorption . . . . .          | 15        |
| 4.7      | N <sub>2</sub> adsorption enthalpy . . . . . | 17        |

---

\*To whom correspondence should be addressed

<sup>†</sup>The Pennsylvania State University

<sup>‡</sup>Cardiff University

## 1 Overview

Shown in this supplemental information is information on the molecular models used, an example script for the effective swelling procedure and all characterization of each simulated sample of each PIM.

## 2 Molecular Models

The molecular model used to simulated the polymers of intrinsic microporosity in this work uses three distinct interaction potentials: 1) ab initio derived atomic partial charges (Coulombic), 2) bonded interactions and 3) van der Waals interactions. To calculate the partial charges, density functional theory calculations were performed using the B3LYP/6-31 g (d,p) for accurate geometry optimization of the designated symmetric repeat unit. Then, to determine the electrostatic potential (ESP) of the monomer, quantum mechanical calculations at the HF/6-31G\* level of theory were run, followed by a restrained electrostatic potential (RESP)<sup>1</sup> charge fitting to map the electrostatic potential to a discrete partial charge distribution that accurately represented the repeat unit's electron density. Charge groups and equivalences were used to maintain symmetry of the repeat unit and charge neutrality. For example, the green highlighted groups of the repeat unit of PIM-SBF (Figure 4b) were restricted to be a charge neutral group such that when they are deleted in the construction of the polymer, charge neutrality is maintained. For all united atom beads, the partial charge of the carbon and associated hydrogens were added together to determine the charge of the bead. Lastly, we use the generalized amber force field (GAFF)<sup>2</sup> for bonded interactions, and the transferable potential for phase equilibria for non-bonded interactions.<sup>3-9</sup>

A naming scheme is used in this work for each united atom bead, similar to previous works.<sup>10</sup> The naming scheme used is: [element][type][hydrogens], where type describes the chemical environment (A = aromatic, H = tetrahedral, L = linear, P = trigonal planar, S = shared aromatic, K = ketone) and hydrogen specifies the number of bonded hydrogen atoms. For example, CH2 is a tetrahedral carbon unit atom bead with two associated hydrogens. An "L" preceding an atom type designates a *linker atom* used in the bonding.

The simulation technique *Polymatic* was used to construct the polymers in this work. A three-dimensional periodic cubic box was packed with approx. 100 monomer repeat units. Using the *Polymatic* open source code, the monomers were artificially bonded together until no more bonds could be formed in a reasonable amount of time. All the details of the *Polymatic* technique can be found in Abbott et al.<sup>10</sup> A sample input script, example shown below, was used for the polymerization input script of PIM-SBF which was used to construct the boxes.

```
cutoff 6.0
link LOA0,OA0 LCS0,CS0
charge -0.3 +0.3
bond 12 4
plane 6,3,7,11 5,2,4,8 <40,>140,||
vector 3,10 2,9 >135
connect
1 3
2 4,5
```

3 6, 7  
4 8  
5 9  
6 10  
7 11, 12  
types  
1 LOA0  
2 LCS0  
3 CS0  
4 LCS0  
5 CA0  
6 CA1  
7 CS0  
8 CA0  
9 CS0  
10 CA0  
11 CA1  
12 LOA0

After the polymers were constructed at a low density ( $\sim 0.5 \text{ g/cm}^3$ ), the boxes were subjected to the 21-step compression and relaxation scheme, which has been shown to generate predictive boxes with experimental-like densities of polymers,<sup>10-13</sup> and discrete molecules.<sup>14,15</sup> The compression scheme was performed in LAMMPS<sup>16</sup> using the following parameters:  $P_{\text{max}} = 5 \times 10^4 \text{ bar}$ ;  $P_{\text{final}} = 1 \text{ bar}$ ;  $T_{\text{max}} = 600 \text{ K}$ ; and  $T_{\text{final}} = 300 \text{ K}$ . A sample LAMMPS input script to run the 21-step MD compression and relaxation scheme can be found in Abbott et al.<sup>10</sup>

Listed below are the simulation details of each sample set of PIMs including: (a) the porosity at all swellings (geometric surface area, box length, void volume, bulk density), (b) the details of each of the five boxes in the sample set (number of united atoms and weight-averaged molecular weight of the polymers in the box) Also shown are the generalized amber force field atom definition, the Transferable Potential for Phase Equilibria type definition and parameters, and the ab initio calculated partial charge for each united atom type in each polymer.

## 2.1 PIM-1

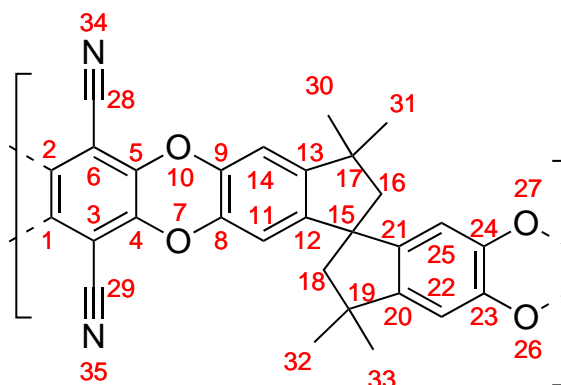

Figure S1: The chemical structure of PIM-1.

Table S1: Simulation details of PIM-1.

(a) Porosity properties of the PIM-1 at all swellings

| swelling (%) | $S_{A_{\text{geo}}}$ ( $\text{m}^2 \text{g}^{-1}$ ) | $L$ ( $\text{\AA}$ ) | $\phi$ ( $\text{cm}^3 \text{g}^{-1}$ ) | $\rho_{\text{bulk}}$ ( $\text{g cm}^{-3}$ ) |
|--------------|-----------------------------------------------------|----------------------|----------------------------------------|---------------------------------------------|
| 0            | $594 \pm 84$                                        | $44.5 \pm 0.5$       | $0.447 \pm 0.018$                      | $0.933 \pm 0.016$                           |
| 2            | $623 \pm 61$                                        | $44.9 \pm 0.5$       | $0.468 \pm 0.019$                      | $0.914 \pm 0.016$                           |
| 4            | $713 \pm 93$                                        | $45.2 \pm 0.5$       | $0.490 \pm 0.019$                      | $0.896 \pm 0.015$                           |
| 6            | $795 \pm 83$                                        | $45.5 \pm 0.5$       | $0.512 \pm 0.020$                      | $0.879 \pm 0.016$                           |
| 9            | $911 \pm 74$                                        | $45.9 \pm 0.5$       | $0.545 \pm 0.020$                      | $0.853 \pm 0.015$                           |
| 12           | $1031 \pm 86$                                       | $46.4 \pm 0.5$       | $0.579 \pm 0.021$                      | $0.829 \pm 0.014$                           |
| 15           | $1148 \pm 119$                                      | $46.8 \pm 0.5$       | $0.614 \pm 0.022$                      | $0.806 \pm 0.014$                           |

(b) Details of each simulation box of PIM-1

| sample | No. of United Atoms | $M_w$ (g/mol) |
|--------|---------------------|---------------|
| 1      | 3745                | 5401          |
| 2      | 3885                | 5347          |
| 3      | 3710                | 6029          |
| 4      | 3745                | 4385          |
| 5      | 3815                | 4955          |

Table S2: Force field parameters of PIM-1. Reprinted (adapted) with permission from Larsen et al.<sup>11</sup> Copyright 2011 American Chemical Society.

| Atom No.       | Atom type | GAFF equivalence |      | TraPPE-UA equivalence |      | Atomic Charge |
|----------------|-----------|------------------|------|-----------------------|------|---------------|
|                |           | Atom type        | Ref. | Atom type             | Ref. |               |
| 1, 2, 4, 5     | CS0       | ca               | 2    | C(aro link)           | 3    | 0.172261      |
| 3, 6           | CA0       | ca               | 2    | R-C(aro)              | 3    | -0.123040     |
| 7, 10, 26, 27  | OA0       | os               | 2    | C(aro)-O(aro)-C(aro)  | 4    | -0.219064     |
| 9, 8, 23, 24   | CS0       | ca               | 2    | C(aro link)           | 3    | 0.177839      |
| 11, 14, 22, 25 | CA1       | ca               | 2    | CH(aro)               | 3    | -0.124962     |
| 12, 13, 20, 21 | CA0       | ca               | 2    | R-C(aro)              | 3    | 0.0383560     |
| 15             | CH0       | c3               | 2    | C                     | 6    | 0.0979454     |
| 17, 19         | CH0       | c3               | 2    | C                     | 6    | 0.0979454     |
| 16, 18         | CH2       | c3               | 2    | CH <sub>2</sub>       | 5    | -0.0164660    |
| 28, 29         | CL0       | c1               | 2    | C(sp)                 | 7    | 0.313718      |
| 34, 35         | NL0       | n1               | 2    | N(nitrile)            | 7    | -0.409990     |
| 30, 31, 32, 33 | CH3       | c3               | 2    | CH <sub>3</sub>       | 5    | 0.0           |

## 2.2 PIM-1c

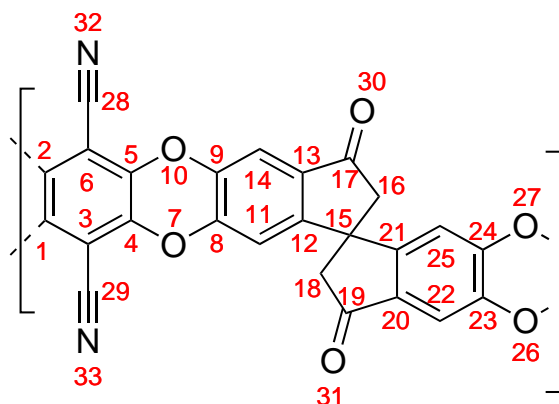

Figure S2: The chemical structure of PIM-1c.

Table S3: Simulation details of PIM-1c.

(a) Porosity properties of the PIM-1c at all swellings

| swelling (%) | $SA_{\text{geo}}$ ( $\text{m}^2\text{g}^{-1}$ ) | $L$ ( $\text{\AA}$ ) | $\phi$ ( $\text{cm}^3\text{g}^{-1}$ ) | $\rho_{\text{bulk}}$ ( $\text{g cm}^{-3}$ ) |
|--------------|-------------------------------------------------|----------------------|---------------------------------------|---------------------------------------------|
| 0            | $505 \pm 85$                                    | $40.8 \pm 0.2$       | $0.426 \pm 0.017$                     | $1.056 \pm 0.019$                           |
| 2            | $562 \pm 87$                                    | $41.1 \pm 0.2$       | $0.445 \pm 0.017$                     | $1.035 \pm 0.019$                           |
| 4            | $649 \pm 88$                                    | $41.4 \pm 0.2$       | $0.464 \pm 0.017$                     | $1.015 \pm 0.018$                           |
| 6            | $704 \pm 76$                                    | $41.6 \pm 0.3$       | $0.484 \pm 0.018$                     | $0.995 \pm 0.018$                           |
| 9            | $817 \pm 83$                                    | $42.0 \pm 0.3$       | $0.513 \pm 0.018$                     | $0.967 \pm 0.017$                           |
| 12           | $942 \pm 75$                                    | $42.4 \pm 0.3$       | $0.544 \pm 0.019$                     | $0.939 \pm 0.017$                           |
| 15           | $1020 \pm 54$                                   | $42.9 \pm 0.3$       | $0.574 \pm 0.020$                     | $0.912 \pm 0.016$                           |

(b) Details of each simulation box of PIM-1c

| sample | No. of United Atoms | $M_w$ (g/mol) |
|--------|---------------------|---------------|
| 1      | 3300                | 43235         |
| 2      | 3300                | 26105         |
| 3      | 3300                | 14120         |
| 4      | 3300                | 28890         |
| 5      | 3300                | 35271         |

Table S4: Force field parameters of PIM-1c. Reprinted (adapted) with permission from Larsen et al.<sup>11</sup> Copyright 2011 American Chemical Society.

| Atom No.       | Atom type | GAFF equivalence |      | TraPPE-UA equivalence |      | Atomic Charge |
|----------------|-----------|------------------|------|-----------------------|------|---------------|
|                |           | Atom type        | Ref. | Atom type             | Ref. |               |
| 1, 2, 4, 5     | CS0       | ca               | 2    | C(aro link)           | 3    | 0.319062      |
| 3, 6           | CA0       | ca               | 2    | R-C(aro)              | 3    | -0.376824     |
| 7, 10, 26, 27  | OA0       | os               | 2    | C(aro)-O(aro)-C(aro)  | 4    | -0.108096     |
| 9, 8, 23, 24   | CS0       | ca               | 2    | C(aro link)           | 3    | -0.193873     |
| 11, 14, 22, 25 | CA1       | ca               | 2    | CH(aro)               | 3    | 0.318224      |
| 12, 13, 20, 21 | CA0       | ca               | 2    | R-C(aro)              | 3    | -0.131754     |
| 15             | CH0       | c3               | 2    | C                     | 6    | 0.0           |
| 17, 19         | CP0       | c2               | 2    | C(sp <sup>2</sup> )   | 8    | 0.314104      |
| 16, 18         | CH2       | c3               | 2    | CH <sub>2</sub>       | 5    | 0.192322      |
| 28, 29         | CL0       | c1               | 2    | C(sp)                 | 7    | 0.302473      |
| 32, 33         | NL0       | n1               | 2    | N(nitrile)            | 7    | -0.368858     |
| 30, 31         | OK0       | oc               | 2    | O(ketone)             | 9    | -0.470344     |

## 2.3 sPIM-1

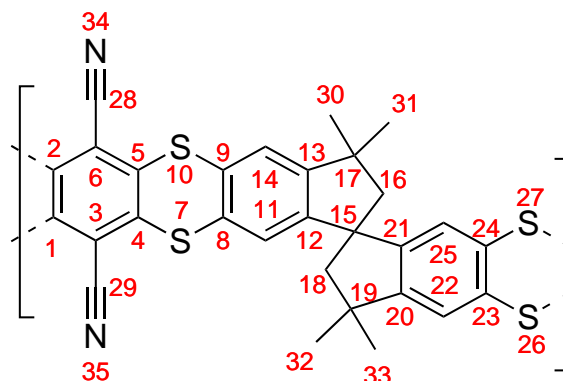

Figure S3: The chemical structure of sPIM-1.

Table S5: Simulation details of sPIM-1.

(a) Porosity properties of the sPIM-1 at all swellings

| swelling (%) | $SA_{\text{geo}}$ ( $\text{m}^2\text{g}^{-1}$ ) | $L$ ( $\text{\AA}$ ) | $\phi$ ( $\text{cm}^3\text{g}^{-1}$ ) | $\rho_{\text{bulk}}$ ( $\text{g cm}^{-3}$ ) |
|--------------|-------------------------------------------------|----------------------|---------------------------------------|---------------------------------------------|
| 0            | $282 \pm 65$                                    | $51.1 \pm 1.4$       | $0.354 \pm 0.015$                     | $1.055 \pm 0.016$                           |
| 2            | $328 \pm 71$                                    | $51.4 \pm 1.4$       | $0.372 \pm 0.015$                     | $1.034 \pm 0.016$                           |
| 4            | $384 \pm 60$                                    | $51.8 \pm 1.4$       | $0.392 \pm 0.015$                     | $1.014 \pm 0.016$                           |
| 6            | $443 \pm 72$                                    | $52.1 \pm 1.5$       | $0.410 \pm 0.016$                     | $0.995 \pm 0.016$                           |
| 9            | $557 \pm 73$                                    | $52.6 \pm 1.5$       | $0.440 \pm 0.016$                     | $0.966 \pm 0.016$                           |
| 12           | $681 \pm 73$                                    | $53.2 \pm 1.5$       | $0.470 \pm 0.017$                     | $0.938 \pm 0.017$                           |
| 15           | $771 \pm 62$                                    | $53.7 \pm 1.5$       | $0.501 \pm 0.017$                     | $0.912 \pm 0.014$                           |

(b) Details of each simulation box of sPIM-1

| sample | No. of United Atoms | $M_w$ (g/mol) |
|--------|---------------------|---------------|
| 1      | 6055                | 11589         |
| 2      | 5005                | 20802         |
| 3      | 5355                | 11932         |
| 4      | 6090                | 17781         |
| 5      | 5845                | 16713         |

Table S6: Force field parameters of sPIM-1. Reprinted (adapted) with permission from Hart et al.<sup>13</sup> Copyright 2013 American Chemical Society.

| Atom No.       | Atom type | GAFF equivalence |      | TraPPE-UA equivalence |      | Atomic Charge |
|----------------|-----------|------------------|------|-----------------------|------|---------------|
|                |           | Atom type        | Ref. | Atom type             | Ref. |               |
| 1, 2, 4, 5     | CS0       | ca               | 2    | C(aro link)           | 3    | -0.1081570    |
| 3, 6           | CA0       | ca               | 2    | R-C(aro)              | 3    | 0.3077860     |
| 7, 10, 26, 27  | S20       | ss               | 2    | C(aro)-S(aro)-C(aro)  | 4    | 0.0043710     |
| 9, 8, 23, 24   | CS0       | ca               | 2    | C(aro link)           | 3    | -0.1892980    |
| 11, 14, 22, 25 | CA1       | ca               | 2    | CH(aro)               | 3    | 0.3261810     |
| 12, 13, 20, 21 | CA0       | ca               | 2    | R-C(aro)              | 3    | -0.2400730    |
| 15             | CH0       | c3               | 2    | C                     | 6    | 0.1865893     |
| 17, 19         | CH0       | c3               | 2    | C                     | 6    | 0.1865893     |
| 16, 18         | CH2       | c3               | 2    | CH <sub>2</sub>       | 5    | 0.0086540     |
| 28, 29         | CL0       | c1               | 2    | C(sp)                 | 7    | 0.2149250     |
| 34, 35         | NL0       | n1               | 2    | N(nitrile)            | 7    | -0.3972980    |
| 30, 31, 32, 33 | CH3       | c3               | 2    | CH <sub>3</sub>       | 5    | 0.0           |

## 2.4 PIM-SBF

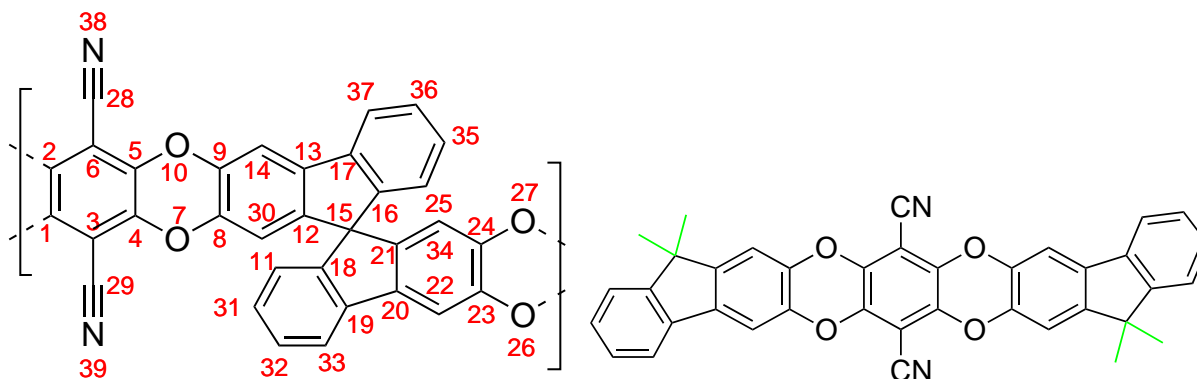

Figure S4: The chemical structure (left) and symmetric repeat unit (right) of PIM-SBF.

Table S7: Simulation details of PIM-SBF.

(a) Porosity properties of the PIM-SBF at all swellings

| swelling (%) | $SA_{\text{geo}}$ ( $\text{m}^2\text{g}^{-1}$ ) | $L$ ( $\text{\AA}$ ) | $\phi$ ( $\text{cm}^3\text{g}^{-1}$ ) | $\rho_{\text{bulk}}$ ( $\text{g cm}^{-3}$ ) |
|--------------|-------------------------------------------------|----------------------|---------------------------------------|---------------------------------------------|
| 0            | $549 \pm 46$                                    | $43.4 \pm 0.1$       | $0.446 \pm 0.009$                     | $1.019 \pm 0.009$                           |
| 2            | $613 \pm 37$                                    | $43.7 \pm 0.1$       | $0.465 \pm 0.009$                     | $0.999 \pm 0.009$                           |
| 4            | $669 \pm 76$                                    | $43.9 \pm 0.1$       | $0.485 \pm 0.009$                     | $0.979 \pm 0.009$                           |
| 6            | $773 \pm 42$                                    | $44.2 \pm 0.1$       | $0.505 \pm 0.009$                     | $0.960 \pm 0.008$                           |
| 9            | $871 \pm 47$                                    | $44.7 \pm 0.1$       | $0.536 \pm 0.010$                     | $0.932 \pm 0.008$                           |
| 12           | $988 \pm 39$                                    | $45.1 \pm 0.1$       | $0.568 \pm 0.010$                     | $0.906 \pm 0.008$                           |
| 15           | $1089 \pm 71$                                   | $45.5 \pm 0.1$       | $0.600 \pm 0.010$                     | $0.880 \pm 0.010$                           |

(b) Details of each simulation box of PIM-SBF

| sample | No. of United Atoms | $M_w$ (g/mol) |
|--------|---------------------|---------------|
| 1      | 3900                | 9739          |
| 2      | 3900                | 14183         |
| 3      | 3900                | 7697          |
| 4      | 3900                | 12292         |
| 5      | 3900                | 6957          |

Table S8: Force field parameters of PIM-SBF from this work.

| Atom No. | Atom type | GAFF equivalence |      | TraPPE-UA equivalence |      | Atomic Charge |
|----------|-----------|------------------|------|-----------------------|------|---------------|
|          |           | Atom type        | Ref. | Atom type             | Ref. |               |
| 1, 5     | CS0       | ca               | 2    | C(aro link)           | 3    | 0.153146      |
| 2, 4     | CS0       | ca               | 2    | C(aro link)           | 3    | 0.195742      |
| 3, 6     | CA0       | ca               | 2    | R-C(aro)              | 3    | -0.121670     |
| 10, 26   | OA0       | os               | 2    | C(aro)-O(aro)-C(aro)  | 4    | -0.234017     |
| 7, 27    | OA0       | os               | 2    | C(aro)-O(aro)-C(aro)  | 4    | -0.245171     |
| 8, 24    | CS0       | ca               | 2    | C(aro link)           | 3    | 0.183783      |
| 9, 23    | CS0       | ca               | 2    | C(aro link)           | 3    | 0.216742      |
| 14, 22   | CA1       | ca               | 2    | CH(aro)               | 3    | -0.304324     |
| 30, 34   | CA1       | ca               | 2    | CH(aro)               | 3    | -0.314783     |
| 13, 20   | CA0       | ca               | 2    | R-C(aro)              | 3    | -0.0155590    |
| 12, 21   | CA0       | ca               | 2    | R-C(aro)              | 3    | 0.0559840     |
| 15       | CH0       | c3               | 2    | C                     | 6    | 0.0834720     |
| 16, 18   | CA0       | ca               | 2    | R-C(aro)              | 3    | 0.117060      |
| 17, 19   | CA0       | ca               | 2    | R-C(aro)              | 3    | 0.0672310     |
| 11, 25   | CA1       | ca               | 2    | CH(aro)               | 3    | -0.0822140    |
| 31, 35   | CA1       | ca               | 2    | CH(aro)               | 3    | 0.0130180     |
| 32, 36   | CA1       | ca               | 2    | CH(aro)               | 3    | -0.0140310    |
| 33, 37   | CA1       | ca               | 2    | CH(aro)               | 3    | -0.0336580    |
| 28, 29   | CL0       | cl               | 2    | C(sp)                 | 7    | 0.322237      |
| 38, 39   | NL0       | nl               | 2    | N(nitrile)            | 7    | -0.411804     |

## 2.5 PIM-SBF-Me

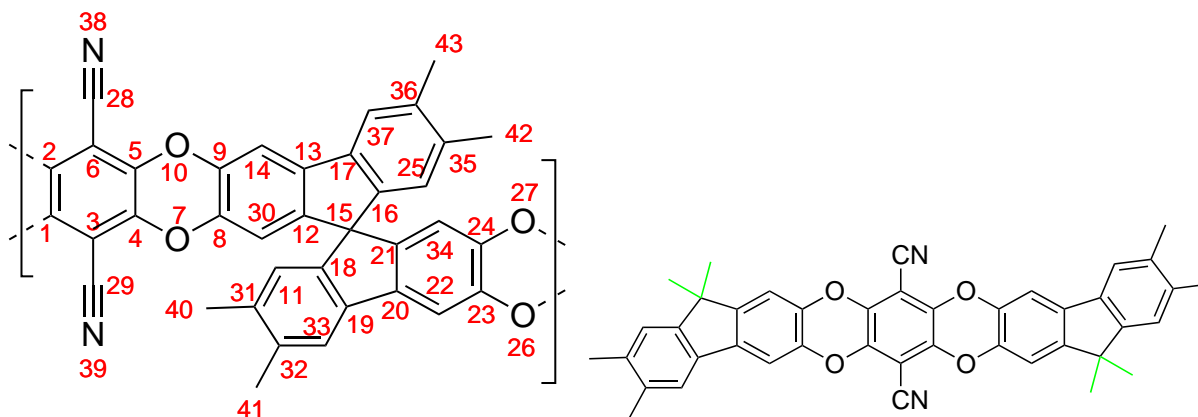

Figure S5: The chemical structure (left) and symmetric repeat unit (right) of PIM-SBF-Me.

Table S9: Simulation details of PIM-SBF-Me.

(a) Porosity properties of the SBF-Me at all swellings

| swelling (%) | $SA_{\text{geo}}$ ( $\text{m}^2\text{g}^{-1}$ ) | $L$ ( $\text{\AA}$ ) | $\phi$ ( $\text{cm}^3\text{g}^{-1}$ ) | $\rho_{\text{bulk}}$ ( $\text{g cm}^{-3}$ ) |
|--------------|-------------------------------------------------|----------------------|---------------------------------------|---------------------------------------------|
| 0            | $864 \pm 155$                                   | $46.7 \pm 0.5$       | $0.550 \pm 0.038$                     | $0.907 \pm 0.031$                           |
| 2            | $932 \pm 139$                                   | $47.0 \pm 0.5$       | $0.571 \pm 0.039$                     | $0.889 \pm 0.031$                           |
| 4            | $1012 \pm 148$                                  | $47.3 \pm 0.5$       | $0.594 \pm 0.040$                     | $0.872 \pm 0.030$                           |
| 6            | $1098 \pm 149$                                  | $47.7 \pm 0.5$       | $0.617 \pm 0.040$                     | $0.855 \pm 0.029$                           |
| 9            | $1226 \pm 128$                                  | $48.1 \pm 0.6$       | $0.652 \pm 0.042$                     | $0.830 \pm 0.028$                           |
| 12           | $1337 \pm 130$                                  | $48.6 \pm 0.6$       | $0.687 \pm 0.043$                     | $0.806 \pm 0.028$                           |
| 15           | $1451 \pm 109$                                  | $49.1 \pm 0.6$       | $0.723 \pm 0.044$                     | $0.783 \pm 0.027$                           |

(b) Details of each simulation box of SBF-Me

| sample | No. of United Atoms | $M_w$ (g/mol) |
|--------|---------------------|---------------|
| 1      | 4300                | 16230         |
| 2      | 4300                | 9907          |
| 3      | 4300                | 10497         |
| 4      | 4300                | 22742         |
| 5      | 4300                | 9740          |



Table S10: Force field parameters of PIM-SBF-Me from this work.

| Atom No. | Atom type | GAFF equivalence |      | TraPPE-UA equivalence |      | Atomic Charge |
|----------|-----------|------------------|------|-----------------------|------|---------------|
|          |           | Atom type        | Ref. | Atom type             | Ref. |               |
| 1, 5     | CS0       | ca               | 2    | C(aro link)           | 3    | 0.166935      |
| 2, 4     | CS0       | ca               | 2    | C(aro link)           | 3    | 0.174542      |
| 3, 6     | CA0       | ca               | 2    | R-C(aro)              | 3    | -0.118530     |
| 10, 26   | OA0       | os               | 2    | C(aro)-O(aro)-C(aro)  | 4    | -0.217261     |
| 7, 27    | OA0       | os               | 2    | C(aro)-O(aro)-C(aro)  | 4    | -0.244781     |
| 8, 24    | CS0       | ca               | 2    | C(aro link)           | 3    | 0.234535      |
| 9, 23    | CS0       | ca               | 2    | C(aro link)           | 3    | 0.165025      |
| 14, 22   | CA1       | ca               | 2    | CH(aro)               | 3    | -0.112199     |
| 30, 34   | CA1       | ca               | 2    | CH(aro)               | 3    | -0.157085     |
| 13, 20   | CA0       | ca               | 2    | R-C(aro)              | 3    | 0.0554840     |
| 12, 21   | CA0       | ca               | 2    | R-C(aro)              | 3    | 0.0593660     |
| 15       | CH0       | c3               | 2    | C                     | 6    | 0.0971560     |
| 16, 18   | CA0       | ca               | 2    | R-C(aro)              | 3    | 0.0221620     |
| 17, 19   | CA0       | ca               | 2    | R-C(aro)              | 3    | 0.0425210     |
| 11, 25   | CA1       | ca               | 2    | CH(aro)               | 3    | -0.151034     |
| 31, 35   | CA0       | ca               | 2    | R-C(aro)              | 3    | 0.111115      |
| 32, 36   | CA0       | ca               | 2    | R-C(aro)              | 3    | 0.0829760     |
| 33, 37   | CA1       | ca               | 2    | CH(aro)               | 3    | -0.120762     |
| 28, 29   | CL0       | cl               | 2    | C(sp)                 | 7    | 0.315785      |
| 38, 39   | NL0       | nl               | 2    | N(nitrile)            | 7    | -0.410415     |
| 41       | CH3       | c3               | 2    | CH <sub>3</sub>       | 5    | 0.00167400    |
| 42       | CH3       | c3               | 2    | CH <sub>3</sub>       | 5    | 0.00360200    |
| 43       | CH3       | c3               | 2    | CH <sub>3</sub>       | 5    | 0.000908000   |
| 40       | CH3       | c3               | 2    | CH <sub>3</sub>       | 5    | 0.00275000    |

### 3 Effective Swelling

```
# Dilation step.
change_box all x scale 1.05 y scale 1.05 z scale 1.05 remap units box

# Equilibration part 1; NVT at 600 K
fix          1 all nvt temp 600 600 100.0
velocity     all create 600 58447419
run          100000
unfix       1

# Equilibration part 2; NVT at 300 K
fix          2 all nvt temp 300 300 100.0
velocity     all create 300 58447419
run          50000
unfix       2
```

The above script can be amended to any LAMMPS input script (e.g., the 21-step compression scheme found in Abbott et al.<sup>10</sup>) to employ the effective swelling procedure used in this work. The above example is using a dilation factor ( $f$ ) of 1.05, which corresponds to  $\sim 15\%$  swelling. To use this script for another swelling percent, the dilation factor should be changed accordingly.

## 4 Characterization

Show below are the characterization of all PIMs for: spirocenter-spirocenter radial distribution functions, structure factors, pore size distributions, nitrogen adsorption isotherms at 77 K.

### 4.1 Radial distribution functions

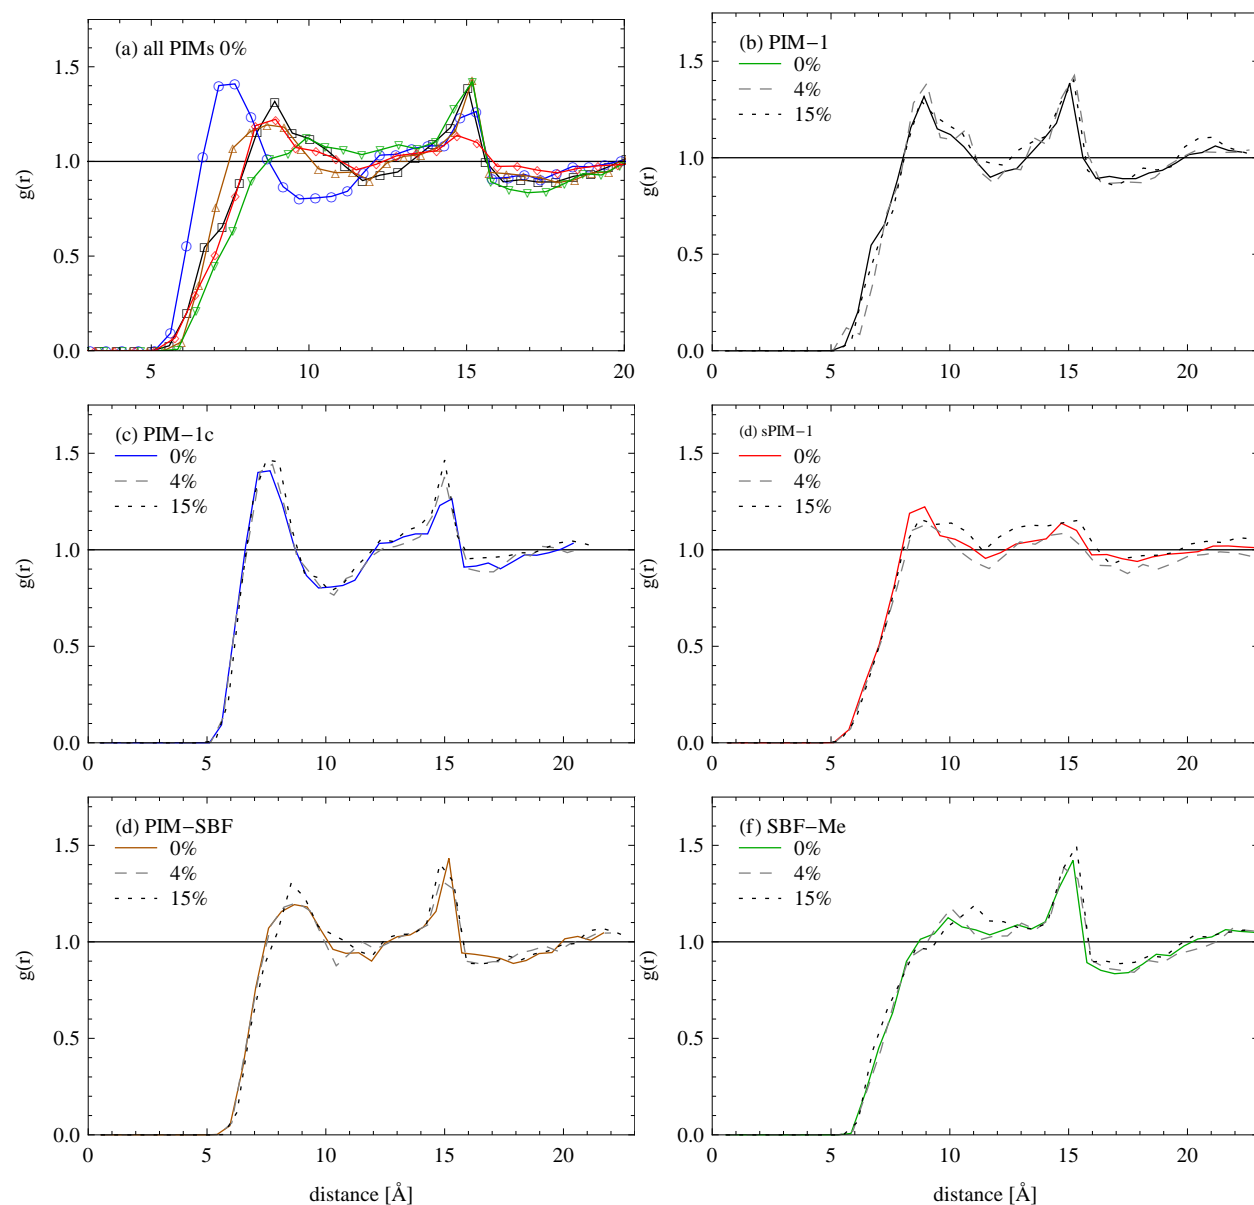

Figure S6: The spirocenter-spirocenter radial distribution function of (a) all PIMs at 0%, and 0%, 4%, and 15% of (b) PIM-1, (c) PIM-1c, (d) sPIM-1, (e) PIM-SBF, and (f) PIM-SBF-Me. Each curve is the average of the simulated sample set.

## 4.2 Structure factors

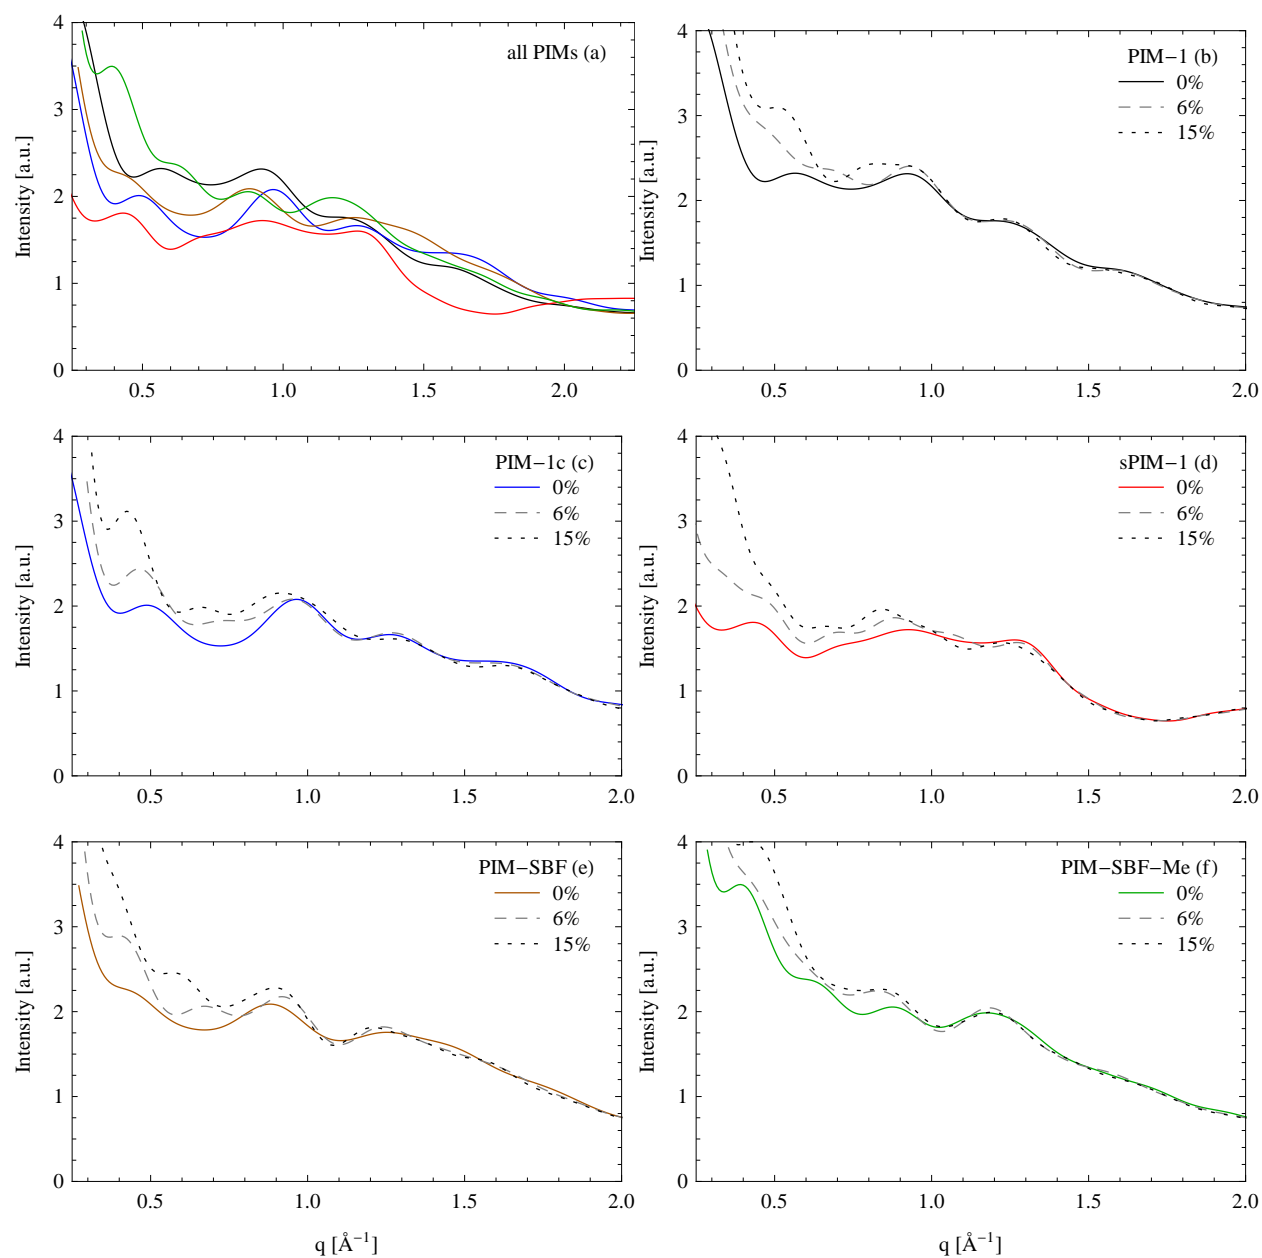

Figure S7: The structure factors of (a) all PIMs at 0%, and 0%, 6%, and 15% of (b) PIM-1, (c) PIM-1c, (d) sPIM-1, (e) PIM-SBF, and (f) PIM-SBF-Me. Each curve is the average of the simulated sample set.

### 4.3 Pore Size Distributions

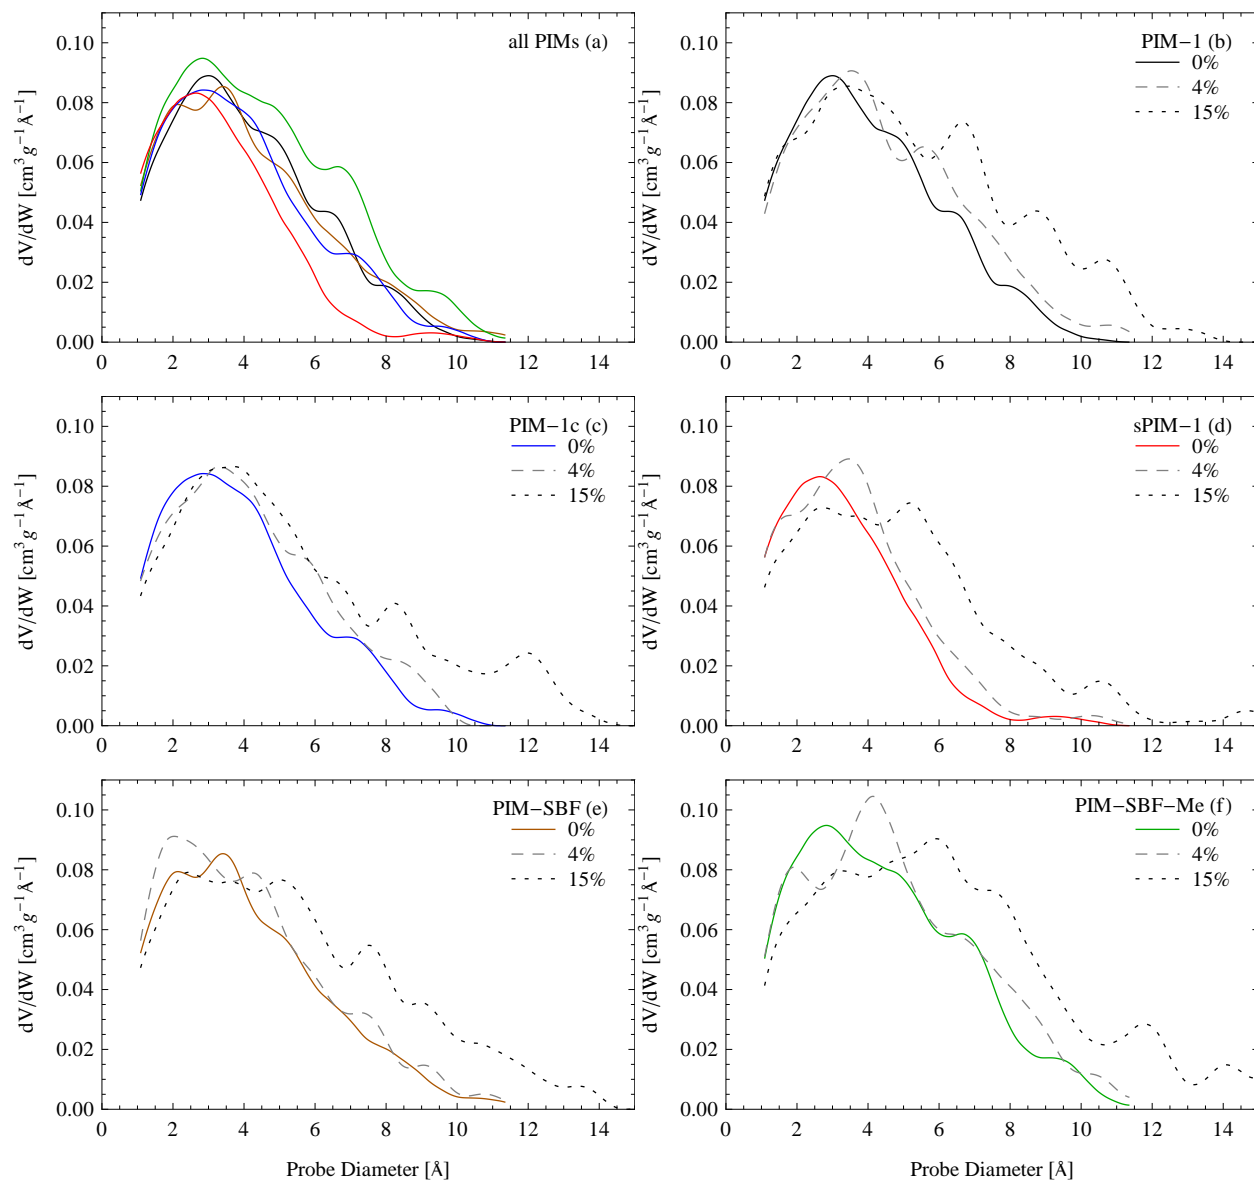

Figure S8: The pore size distribution curves of (a) all PIMs at 0%, and 0%, 4%, and 15% of (b) PIM-1, (c) PIM-1c, (d) sPIM-1, (e) PIM-SBF, and (f) PIM-SBF-Me. Each curve is the average of the simulated sample set.

## 4.4 Curling Angle Distributions

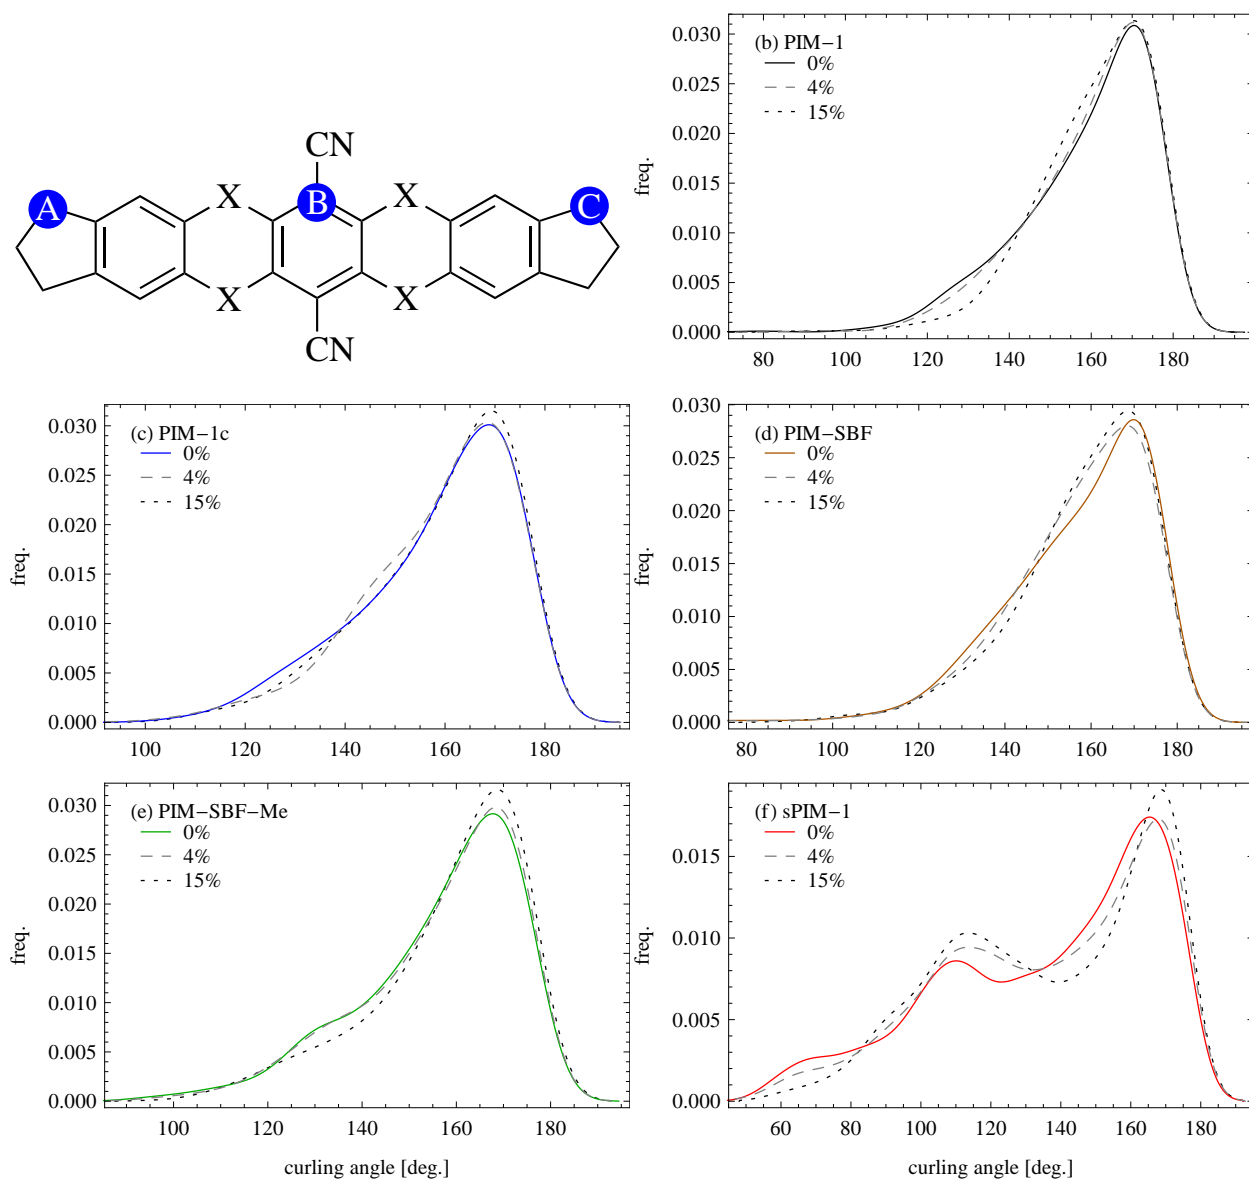

Figure S9: The backbone 'curling' angle distributions, as define in (a) by the  $\angle ABC$ , for 0%, 4%, and 15% of (b) PIM-1, (c) PIM-1c, (d) sPIM-1, (e) PIM-SBF, and (f) PIM-SBF-Me. Averaged over 10 snapshots of a 500 ps NVT MD simulation.

## 4.5 Spiro-Angle Distributions

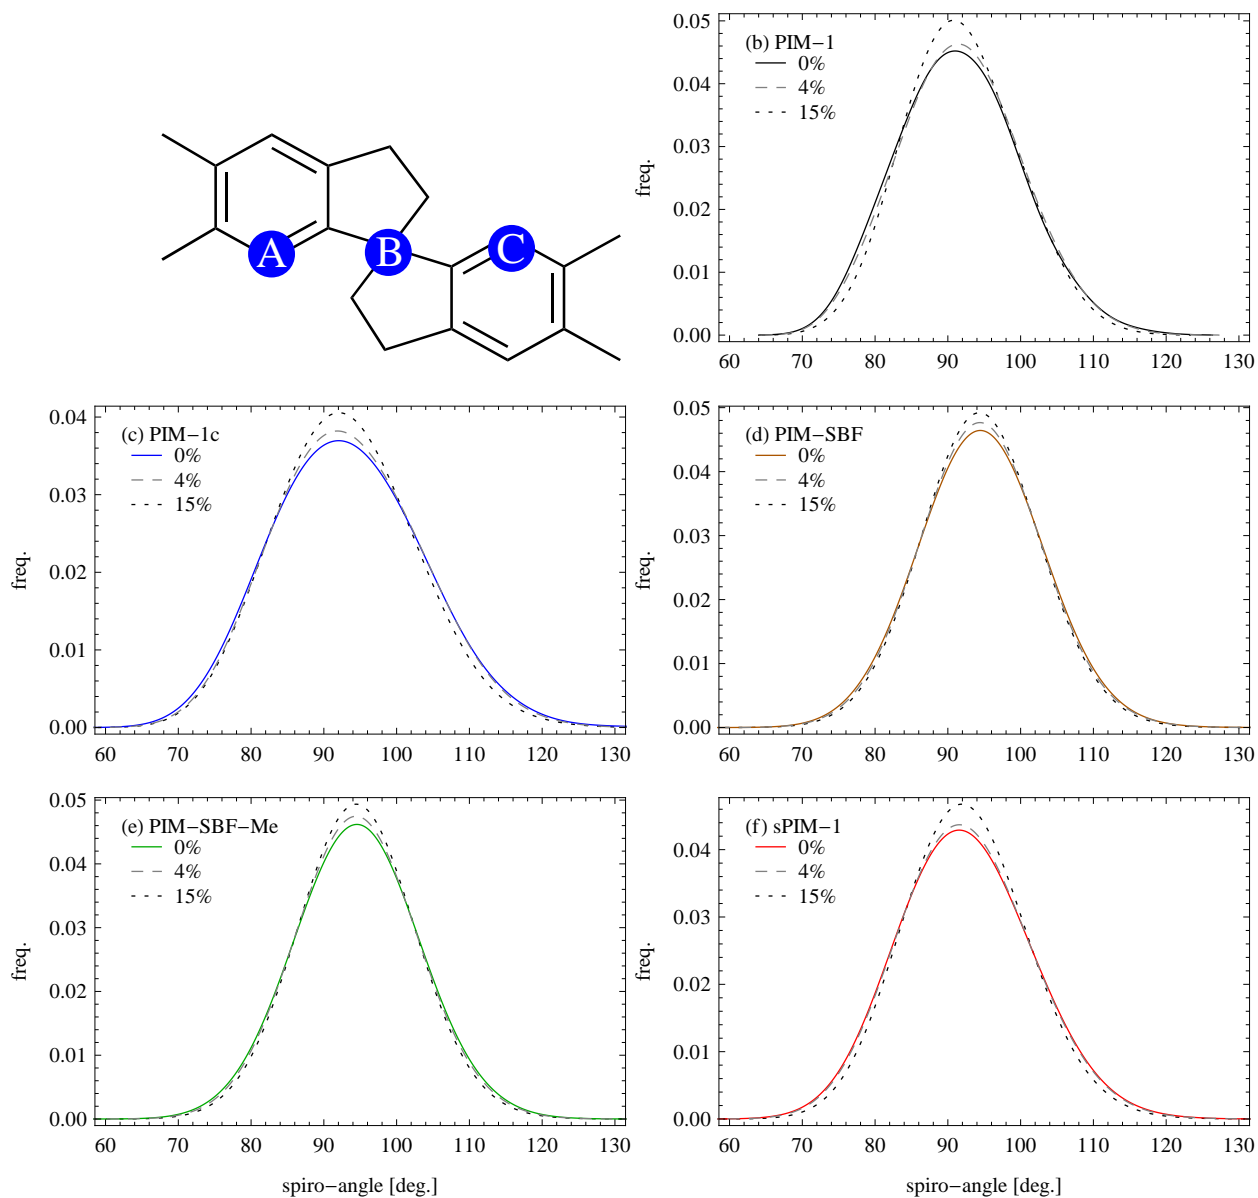

Figure S10: The spirocenter 'spiro-angle' distributions, as define in (a) by the  $\angle ABC$ , for 0%, 4%, and 15% of (b) PIM-1, (c) PIM-1c, (d) sPIM-1, (e) PIM-SBF, and (f) PIM-SBF-Me. Averaged over 10 snapshots of a 500 ps NVT MD simulation.

## 4.6 N<sub>2</sub> adsorption

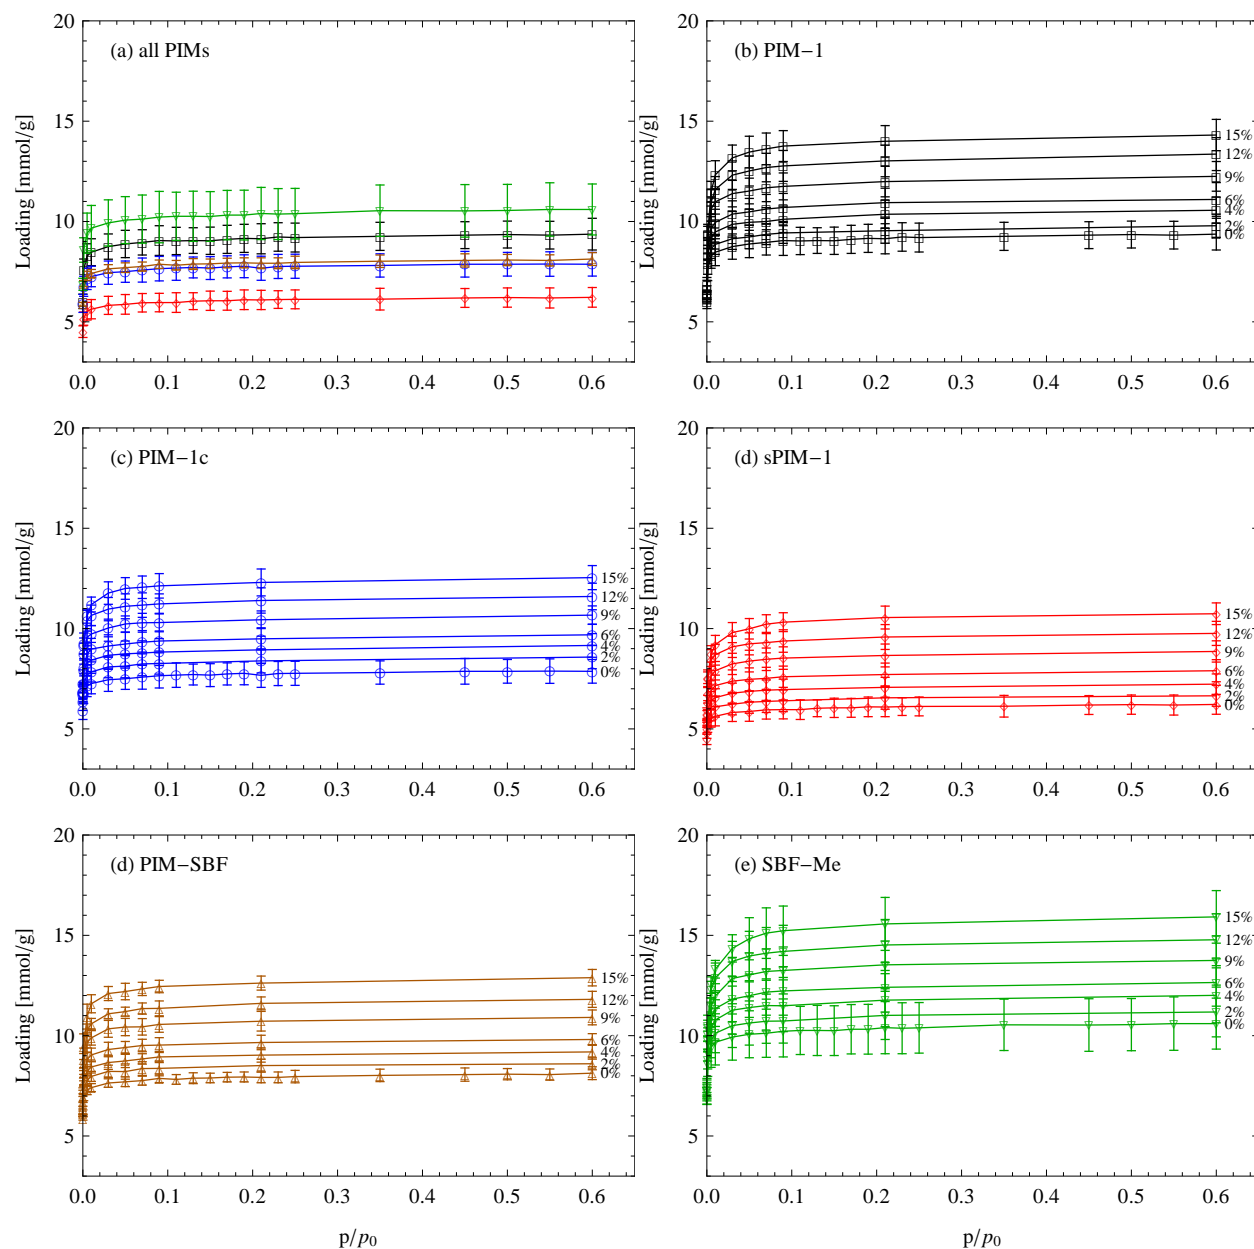

Figure S11: The N<sub>2</sub> adsorption isotherm of the simulated samples of (a) all PIMs at 0%, (b) PIM-1, (c) PIM-1c, (d) sPIM-1, (e) PIM-SBF, and (f) PIM-SBF-Me. All isotherms are represented as the average and standard deviation of the five simulation samples in each sample set.

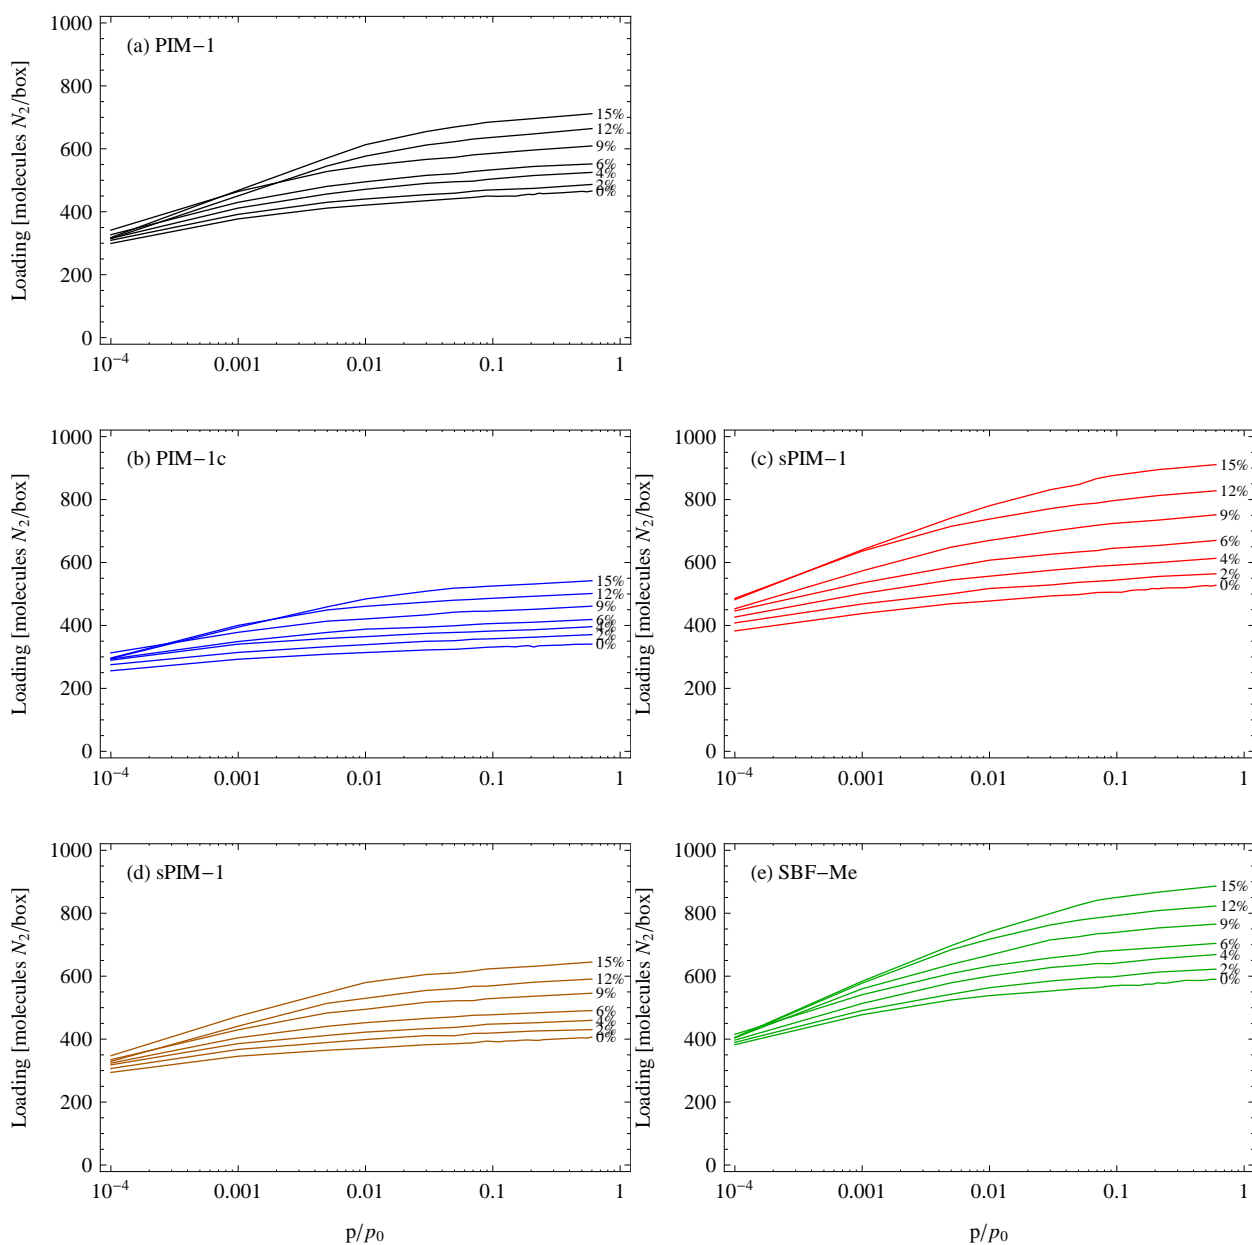

Figure S12: The number of molecules of  $N_2$  adsorbed per simulation box of the simulated samples of (a) PIM-1, (b) PIM-1c, (c) sPIM-1, (d) PIM-SBF, and (e) PIM-SBF-Me. All isotherms are represented as the average of the five simulation samples in each sample set.



## 4.7 N<sub>2</sub> adsorption enthalpy

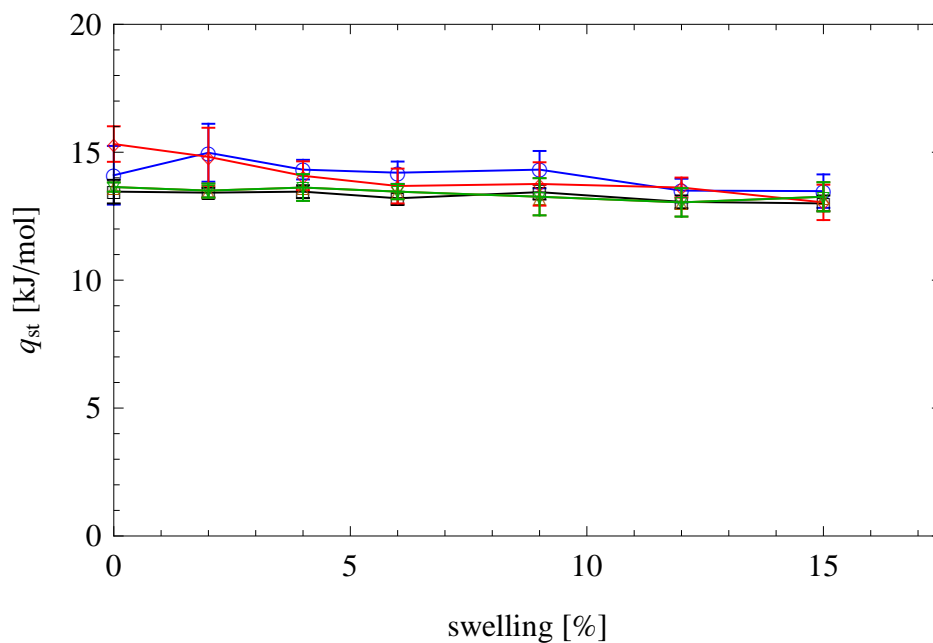

Figure S13: The N<sub>2</sub> enthalpy of adsorption of the simulated samples calculated at the lowest pressure (0.0001 bar) as a function of swelling percent for: PIM-1 (□), PIM-1c (○), PIM-SBF (△), PIM-SBF-Me (▽), sPIM-1 (◇). All values are represented as the average and standard deviation of the five simulation samples in each sample set.

## References

- (1) Bayly, C. I.; Cieplak, P.; Cornell, W. D.; Kollman, P. A. *J. Phys. Chem.* **1993**, *97*, 10269–10280.
- (2) Wang, J.; Wolf, R. M.; Caldwell, J. W.; Kollman, P. A.; Case, D. A. *J. Comput. Chem.* **2004**, *25*, 1157–74.
- (3) Wick, C. D.; Martin, M. G.; Siepmann, J. I. *J. Phys. Chem. B* **2000**, *104*, 8008–8016.
- (4) Rai, N.; Siepmann, J. I. *J. Phys. Chem. B* **2007**, *111*, 10790–10799.
- (5) Martin, M. G.; Siepmann, J. I. *J. Phys. Chem. B* **1998**, *102*, 2569–2577.
- (6) Martin, M. G.; Siepmann, J. I. *J. Phys. Chem. B* **1999**, *103*, 4508–4517.
- (7) Wick, C. D.; Stubbs, J. M.; Rai, N.; Siepmann, J. I. *J. Phys. Chem. B* **2005**, *109*, 18974–18982.
- (8) Stubbs, J. M.; Potoff, J. J.; Siepmann, J. I. *J. Phys. Chem. B* **2004**, *108*, 17596–17605.
- (9) Lee, J.-S.; Wick, C. D.; Stubbs, J. M.; Siepmann, J. I. *Mol. Phys.* **2005**, *103*, 99–104.
- (10) Abbott, L. J.; Hart, K. E.; Colina, C. M. *Theor. Chem. Acc.* **2013**, *132*, 1334.
- (11) Larsen, G. S.; Lin, P.; Hart, K. E.; Colina, C. M. *Macromolecules* **2011**, *44*, 6944–6951.
- (12) Hart, K. E.; Abbott, L. J.; Colina, C. M. *Mol. Simul.* **2013**, *39*, 397–404.
- (13) Hart, K. E.; Abbott, L. J.; McKeown, N. B.; Colina, C. M. *Macromolecules* **46**, 5371–5380.
- (14) Abbott, L. J.; McDermott, A. G.; Del Regno, A.; Taylor, R. G. D.; Bezzu, C. G.; Msayib, K. J.; McKeown, N. B.; Siperstein, F. R.; Runt, J.; Colina, C. M. *J. Phys. Chem. B* **2013**, *117*, 355–364.
- (15) Del Regno, A.; Siperstein, F. R.; Taylor, R. G. D.; McKeown, N. B. *Microporous Mesoporous Mater.* **2013**, *176*, 55–63.
- (16) Plimpton, S. *J. Comput. Phys.* **1995**, *117*, 1–19.
